# Supplementary material for: Urinary L-FABP as an Early Biomarker for Pediatric Acute Kidney Injury Following Cardiac Surgery with Cardiopulmonary Bypass: A Systematic Review and Meta-Analysis
Source: MDPI journal article supplement (doi:10.3390/ijms25094912), 2024-04-30
Supplement: s1 [file s1]

**SUPPLEMENTARY MATERIAL:****Supplementary Table S1.**

| <b>Database</b> | <b>Search equations</b>                                                                                                                                                                                                                                                                                            | <b>Results</b> |
|-----------------|--------------------------------------------------------------------------------------------------------------------------------------------------------------------------------------------------------------------------------------------------------------------------------------------------------------------|----------------|
| Pubmed/MEDLINE  | ((("Acute Kidney Injury") OR ("Acute Renal Failure"))) AND ((("Cardiac Surgery") OR ("Cardiopulmonary Bypass") OR (CPB) OR ("Extracorporeal Circulation"))) AND ((("Liver Fatty Acid Binding Protein") OR ("Liver Fatty Acid-Binding Protein") OR (L-FABP) OR (uL-FABP)) AND ((Urine) OR (Urinary)) AND (Children) | <b>24</b>      |
| Web of Science  | ((("Acute Kidney Injury") OR ("Acute Renal Failure"))) AND ((("Cardiac Surgery") OR ("Cardiopulmonary Bypass") OR (CPB) OR ("Extracorporeal Circulation"))) AND ((("Liver Fatty Acid Binding Protein") OR ("Liver Fatty Acid-Binding Protein") OR (L-FABP) OR (uL-FABP)) AND ((Urine) OR (Urinary)) AND (Children) | <b>28</b>      |
| Scopus          | ((("Acute Kidney Injury") OR ("Acute Renal Failure"))) AND ((("Cardiac Surgery") OR ("Cardiopulmonary Bypass") OR (CPB) OR ("Extracorporeal Circulation"))) AND ((("Liver Fatty Acid Binding Protein") OR ("Liver Fatty Acid-Binding Protein") OR (L-FABP) OR (uL-FABP)) AND ((Urine) OR (Urinary)) AND (Children) | <b>508</b>     |
| Cochrane        | ((("Acute Kidney Injury") OR ("Acute Renal Failure"))) AND ((("Cardiac Surgery") OR ("Cardiopulmonary Bypass") OR (CPB) OR ("Extracorporeal Circulation"))) AND ((("Liver Fatty Acid Binding Protein") OR ("Liver Fatty Acid-Binding Protein") OR (L-FABP) OR (uL-FABP)) AND ((Urine) OR (Urinary)) AND (Children) | <b>1</b>       |

Four databases were searched using main terms such as "Acute Kidney Injury", "Cardiopulmonary Bypass" and "L-FABP" totalizing 561 results prior to the process of removal of duplicates.

**Supplementary Table S2.**

| Author           | Q1      | Q2  | Q3  | Q4      | Q5 | Q6  | Q7      | Q8  | Q9  | Q10 | Overall assessment (Y/T) | Quality assessment |
|------------------|---------|-----|-----|---------|----|-----|---------|-----|-----|-----|--------------------------|--------------------|
| Portilla, 2008   | Unclear | Yes | Yes | Yes     | NA | Yes | Unclear | Yes | Yes | Yes | 7/9 (78%)                | GOOD               |
| Krawczeski, 2011 | Yes     | Yes | No  | Unclear | NA | Yes | Unclear | Yes | Yes | Yes | 6/9 (67%)                | FAIR               |
| Parikh, 2013     | Yes     | Yes | Yes | Yes     | NA | Yes | Unclear | Yes | Yes | Yes | 8/9 (89%)                | GOOD               |
| Peco-Antić, 2013 | Yes     | Yes | Yes | Yes     | NA | Yes | Yes     | Yes | Yes | Yes | 9/9 (100%)               | GOOD               |
| Zappitelli, 2015 | Yes     | Yes | Yes | Yes     | NA | Yes | Unclear | Yes | Yes | Yes | 8/9 (89%)                | GOOD               |
| Greenberg, 2018  | Yes     | Yes | No  | Yes     | NA | Yes | Unclear | Yes | Yes | No  | 6/9 (67%)                | FAIR               |
| Yoneyama, 2020   | Yes     | Yes | Yes | Yes     | NA | Yes | Unclear | Yes | Yes | Yes | 8/9 (89%)                | GOOD               |

**Table S2.** Quality assessment: JBI's checklist for diagnostic accuracy test studies.

JBI, Joanna Briggs Institute; NA, not applicable; Y/T, yes/total, not applicable were excluded from total; Q1= Was a consecutive or random sample of patients enrolled? Q2= Was a case control design avoided? Q3= Did the study avoid inappropriate exclusions? Q4= Were the index test results interpreted without knowledge of the results of the reference standard? Q5= If a threshold was used, was it pre-specified? Q6= Is the reference standard likely to correctly classify the target condition? Q7= Were the reference standard results interpreted without knowledge of the results of the index test? Q8= Was there an appropriate interval between index test and reference standard? Q9= Did all patients receive the same reference standard? Q10= Were all patients included in the analysis?

**Supplementary Table S3.**

| Author           | Q1  | Q2  | Q3  | Q4  | Q5  | Q6 | Q7 | Q8  | Q9  | Q10 | Overall assessment (Y/T) | Quality assessment |
|------------------|-----|-----|-----|-----|-----|----|----|-----|-----|-----|--------------------------|--------------------|
| Ivanisevic, 2013 | Yes | Yes | Yes | Yes | Yes | No | No | Yes | Yes | Yes | 8/10 (80%)               | GOOD               |
| Dong, 2017       | Yes | Yes | Yes | Yes | Yes | No | No | Yes | Yes | Yes | 8/10 (80%)               | GOOD               |

**Table S3.** Quality assessment: JBI's checklist for case-control studies.

JBI, Joanna Briggs Institute; NA, not applicable; Y/T, yes/total, not applicable were excluded from total; Q1= Were the groups comparable other than the presence of disease in cases or the absence of disease in controls? Q2= Were cases and controls matched appropriately? Q3= Were the same criteria used for identification of cases and controls? Q4= Was exposure measured in a standard, valid and reliable way? Q5= Was exposure measured in the same way for cases and controls? Q6= Were confounding factors identified? Q7= Were strategies to deal with confounding factors stated? Q8= Were outcomes assessed in a standard, valid and reliable way for cases and controls? Q9= Was the exposure period of interest long enough to be meaningful? Q10= Was appropriate statistical analysis used?
